# Supplementary material
Source: ML conference proceedings conference paper supplement (https://openaccess.thecvf.com/content/ICCV_2017/html/Shibata_Misalignment-Robust_Joint_Filter_ICCV_2017_paper.html)
Supplement: Supplementary file 1 [file Shibata_Misalignment-Robust_Joint_Filter_ICCV_2017_supplemental.zip]

Archive with 2 entries (2 files):
- 1501_supp/1501_supp.pdf
- 1501_supp/1501_supp_movie.mp4
